# Supplementary material for: Study on thermodynamic properties and estimation of polarity of ionic liquids {[Cnmmim][NTf2] (n = 2, 4)}
Source: Royal Society of Chemistry journal article supplement (doi:10.1039/c4ra04391j), 2014-07-17
Supplement: c4ra04391j1.pdf [file c4ra04391j1.pdf]

## Study on thermodynamic properties and estimation of polarity of ionic liquids { [C<sub>n</sub>mmim][NTf<sub>2</sub>] (n = 2, 4) }

Jie Wei <sup>a</sup>, Tianyou Ma <sup>a</sup>, Xiaoxue Ma <sup>a</sup>, Wei Guan <sup>a,\*</sup>, Qingshan Liu <sup>b,\*</sup>, Jiazhen Yang <sup>a</sup>

<sup>a</sup>College of Chemistry, Liaoning University, Shenyang 110036, P. R. C.

<sup>b</sup>Advanced Rechargeable Batteries Laboratory, Dalian Institute of Chemical Physics, Chinese Academy of Sciences, Dalian 116023, P. R. C.

### Section A <sup>1</sup>H NMR spectra

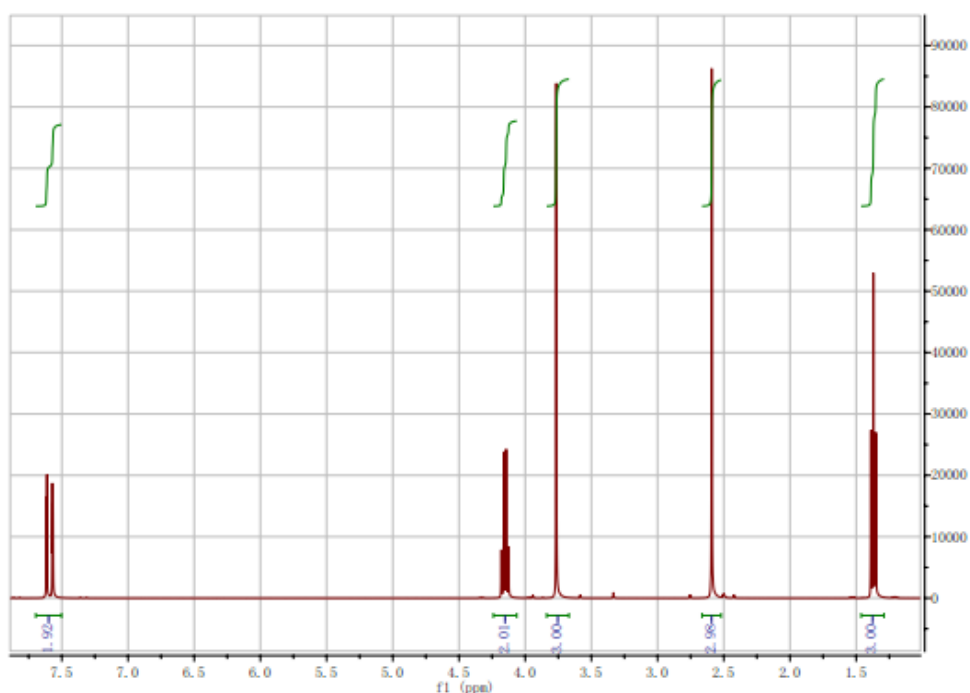

**Fig. S1** <sup>1</sup>H NMR of IL [C<sub>2</sub>mmim][NTf<sub>2</sub>]

**Table S1** The <sup>1</sup>H NMR spectrum  $\delta_H$  (400 MHz, DMSO) of IL [C<sub>2</sub>mmim][NTf<sub>2</sub>]

| Chemical shift  | Hydrogen number | Radical                          |
|-----------------|-----------------|----------------------------------|
| 1.351 (t)       | 3               | NCH <sub>2</sub> CH <sub>3</sub> |
| 2.558 (s)       | 3               | CCH <sub>3</sub>                 |
| 3.753 (s)       | 3               | NCH <sub>3</sub>                 |
| 4.135~4.196 (q) | 2               | NCH <sub>2</sub> CH <sub>3</sub> |
| 7.553 (d)       | 1               | C(4)H                            |
| 7.614 (d)       | 1               | C(5)H                            |

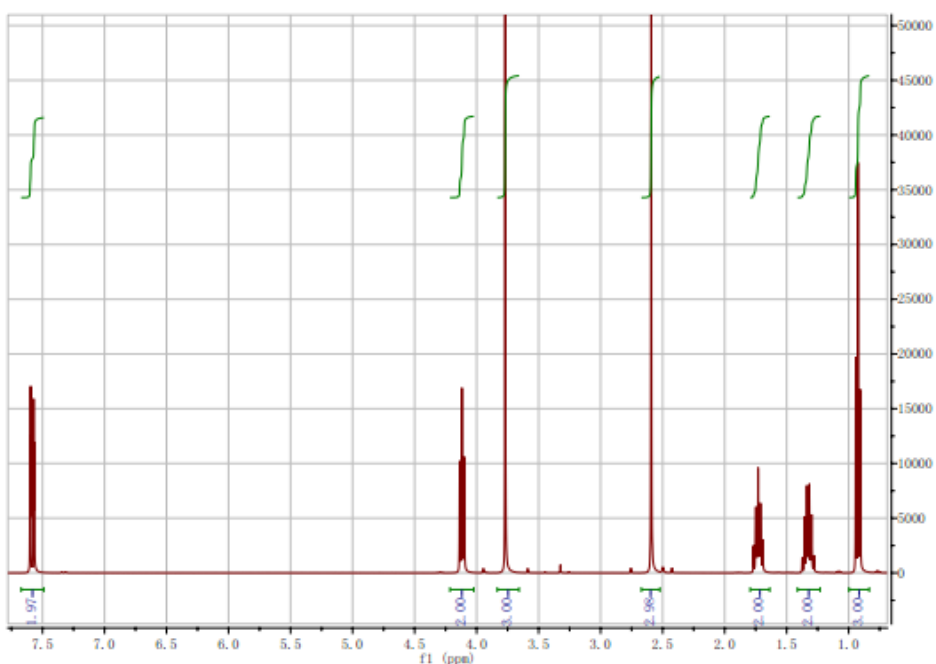

**Fig. S2**  $^1\text{H}$  NMR of IL  $[\text{C}_4\text{mmim}][\text{NTf}_2]$

**Table S2** The  $^1\text{H}$  NMR spectrum  $\delta_{\text{H}}$  (400 MHz, DMSO) of IL  $[\text{C}_4\text{mmim}][\text{NTf}_2]$

| Chemical shift | Hydrogen number | Radical                                         |
|----------------|-----------------|-------------------------------------------------|
| 0.806~0.901(t) | 3               | $\text{NCH}_2\text{CH}_3$                       |
| 1.251~1.298(m) | 2               | $\text{NCH}_2\text{CH}_2\text{CH}_2\text{CH}_3$ |
| 1.697~1.752(m) | 2               | $\text{NCH}_2\text{CH}_2\text{CH}_2\text{CH}_3$ |
| 2.606(s)       | 3               | $\text{CCH}_3$                                  |
| 3.751(s)       | 3               | $\text{NCH}_3$                                  |
| 4.195~4.250(t) | 2               | $\text{NCH}_2\text{CH}_2\text{CH}_2\text{CH}_3$ |
| 7.569 (d)      | 1               | $\text{C}(4)\text{H}$                           |
| 7.605 (d)      | 1               | $\text{C}(5)\text{H}$                           |

### Section B Thermal analysis

Calorimetric data were obtained with a differential scanning calorimeter DSC1 (Universal V4.5A TA Instruments). The temperature was  $-100$ – $100$  °C with heating rate of  $10$  °C $\cdot$ min $^{-1}$ . Then samples were incubated at  $-100$  °C for 5 min and were then heated to  $100$  °C.

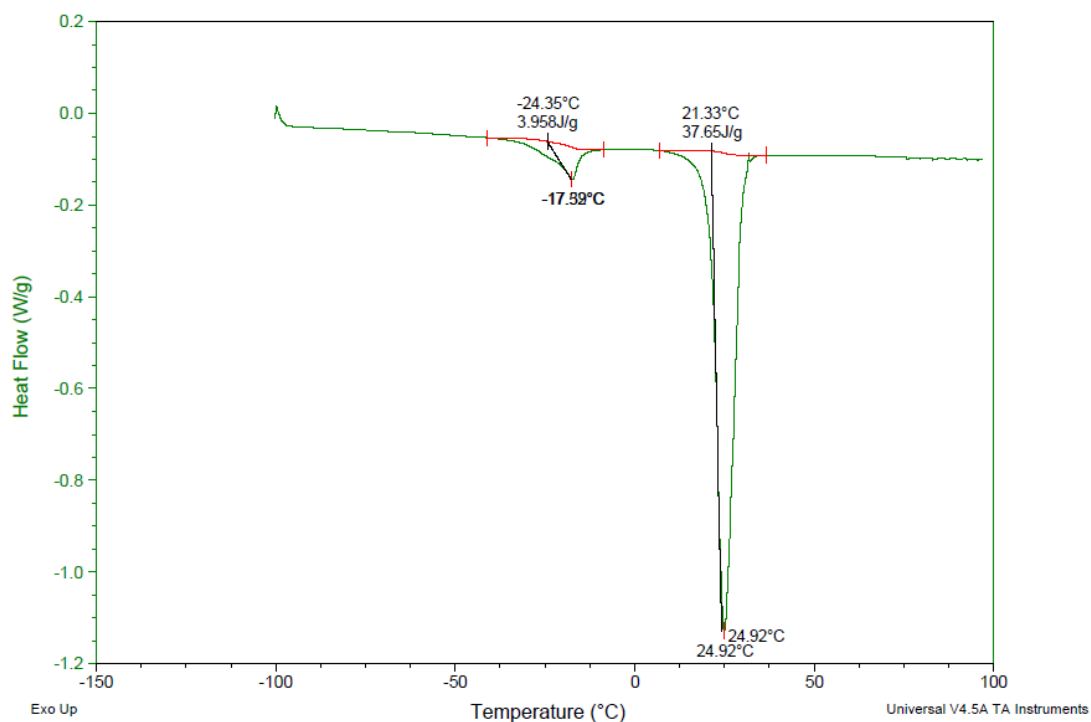

**Fig. S3** DSC trace of IL [C<sub>2</sub>mmim][NTf<sub>2</sub>]

The temperature range was – 100-100°C with heating rate of 10 °C·min<sup>-1</sup>. Then samples were incubated at – 100°C for 5 min and were then heated to 100°C.

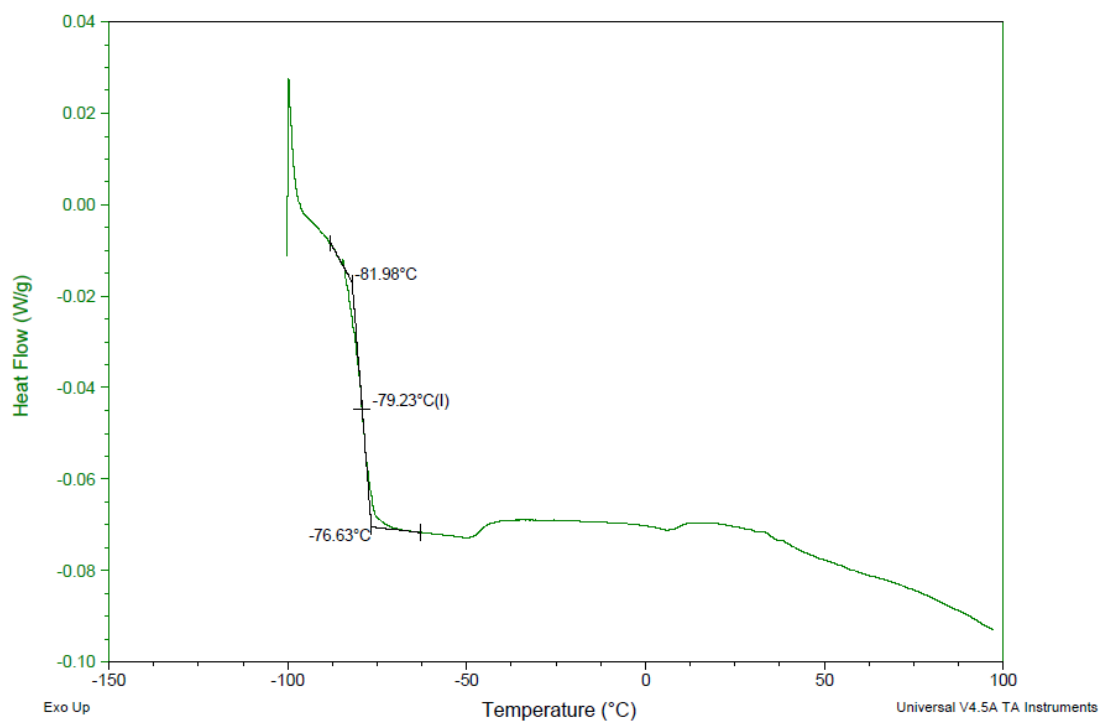

**Fig. S4** DSC trace of IL [C<sub>4</sub>mmim][NTf<sub>2</sub>]
